# Supplementary material
Source: PubMed Central journal article supplement (PMC7507998)
Supplement: ry202040suppa1.pdf [file ry202040suppa1.pdf]

## Appendix E1

**Table E1**

| Patient | Age/sex | Past Med Hx          | Days on mech vent at the time of MRI | Lowest O2 Sat | Hospital day w/lowest O2 Sat | D-dimer (by the time of MRI) | Therapeutic Anticoagulation       | Creatinine      | Transaminase                       | Blood Cx                                                          | Leukoenceph on MRI | Microhem on MRI |
|---------|---------|----------------------|--------------------------------------|---------------|------------------------------|------------------------------|-----------------------------------|-----------------|------------------------------------|-------------------------------------------------------------------|--------------------|-----------------|
| 1       | 56/M    | —                    | 17                                   | 70            | 1                            | 500–4600                     | Heparin (stopped due to HIT)      | 0.5–8.7 (HD)    | ALT = 179<br>AST = 204             | Neg                                                               | +                  | +               |
| 2       | 45/M    | HL                   | 23                                   | 68            | 17                           | 4309–6,206                   | Heparin                           | 2.9–4.2 (HD)    | Normal                             | <i>Enterobacter</i> (meropenem)                                   | —                  | +               |
| 3       | 60/M    | —                    | 33                                   | 72            | 21                           | 3414–>10,000                 | Heparin, switched to argatroban   | 0.7–5.3 (HD)    | Normal                             | <i>Enterococcus faecium</i> (vancomycin + piperacilin/tazobactam) | +                  | +               |
| 4       | 43/M    | —                    | 33                                   | 78            | 18                           | 1,279–>10,000                | Heparin                           | 3.49–10.2 (HD)  | ALT = 171<br>AST = 70              | Neg                                                               | +                  | —               |
| 5       | 64/M    | HTN, HL, DM2, CAD    | 28                                   | 84            | 3                            | 3,317                        | Plavix, heparin held for GI bleed | 1.86–5.08 (HD)  | AST = 94<br>ALT = 94               | Neg                                                               | +                  | +               |
| 6       | 63/F    | HTN, HL, DM          | 27                                   | 79            | 18                           | 891–2,424                    | Heparin, then lovenox             | 0.6–2.4         | ALT = 65<br>AST = 71               | Staph epidermidis (contaminant?)                                  | +                  | +               |
| 7       | 49/M    | HTN, DM              | 15                                   | 85            | 3                            | 693–3,118                    | —                                 | 0.7–10.4 (HD)   | ALT = 136<br>AST = 208             | <i>Klebsiella</i> (piperacillin/tazobactam)                       | +                  | —               |
| 8       | 38/M    | HTN, DM, cocaine use | 27                                   | 70            | 2                            | 1,110–5,959                  | Lovenox (DVT)                     | 0.88–11.25 (HD) | ALT = 489<br>AST = 397             | Staph epidermidis (contaminant?)                                  | +                  | +               |
| 9       | 43/M    | —                    | 25                                   | 72            | 1                            | 2,651                        | Heparin drip                      | 0.8–2.7         | Normal                             | Neg                                                               | +                  | —               |
| 10      | 64/M    | HTN, A Fib           | 23                                   | 60            | 14                           | 2,861–8,305                  | Heparin drip then argatroban      | 1.54–5.39       | ALT = (43–404)<br>AST = (52–1,322) | Neg                                                               | +                  | +               |
| 11      | 62/F    | HTN, DM2, obesity    | 41                                   | 68            | 2                            | 1,101–8,091                  | Heparin drip then lovenox         | 0.72–10.86 (HD) | Normal                             | Neg                                                               | +                  | —               |

Normal values: D-dimer (normal < 230 ng/mL DDU); AST (normal 5–34 U/L); ALT (normal 0–37 U/L); Creatinine (0.6–1.1 mg/dL).  
HTN = hypertension, HL = hyperlipidemia, DM2 = diabetes mellitus type 2, CAD = coronary artery disease, A Fib = atrial

fibrillation, GI = gastrointestinal, DVT = deep vein thrombosis, ALT = alanine aminotransferase, AST = aspartate aminotransferase, Leukoenceph = leukoencephalopathy, Microhem = microhemorrhage, HIT = heparin-induced thrombocytopenia, HD = hemodialysis.

## Brain MRI-Routine Protocol

**Table E2: Head Coil**

| Sequence            | Plane | Slice Thickness (mm) | FOV (mm) |
|---------------------|-------|----------------------|----------|
| Trace Diffusion/ADC | AX    | 5                    | 220      |
| T1                  | SAG*  | 5                    | 220      |
| FLAIR               | AX    | 5                    | 220      |
| T2                  | AX    | 5                    | 220      |
| SWI                 | AX    | 5                    | 220      |
| T2 HASTE            | COR   | 5                    | 220      |

\* If MRI is performed with administration of intravenous contrast, SAG T1 is replaced by precontrast AX T1 of 5-mm thickness. Postcontrast sequences would include axial and coronal spine-echo postcontrast images of 5-mm thickness.
